# Supplementary material for: Isolation and characterization of Bacillus subtilis strain 1-L-29, an endophytic bacteria from Camellia oleifera with antimicrobial activity and efficient plant-root colonization
Source: PubMed Central journal article supplement (PMC7185607; doi:10.1371/journal.pone.0232096), 2020-04-27

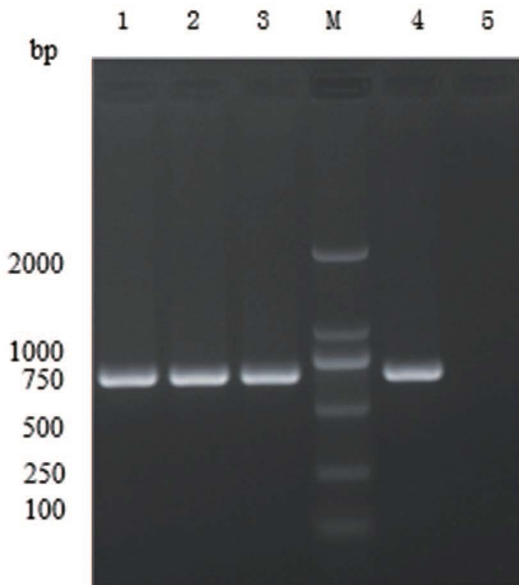

Supplement: pone.0232096.s005.pdf [file pone.0232096.s005.pdf]
